# Supplementary material
Source: PubMed Central journal article supplement (PMC3393093)
Supplement: NIHMS390145-supplement-Supplemental.pdf [file NIHMS390145-supplement-Supplemental.pdf]

# Supplementary Figure 1

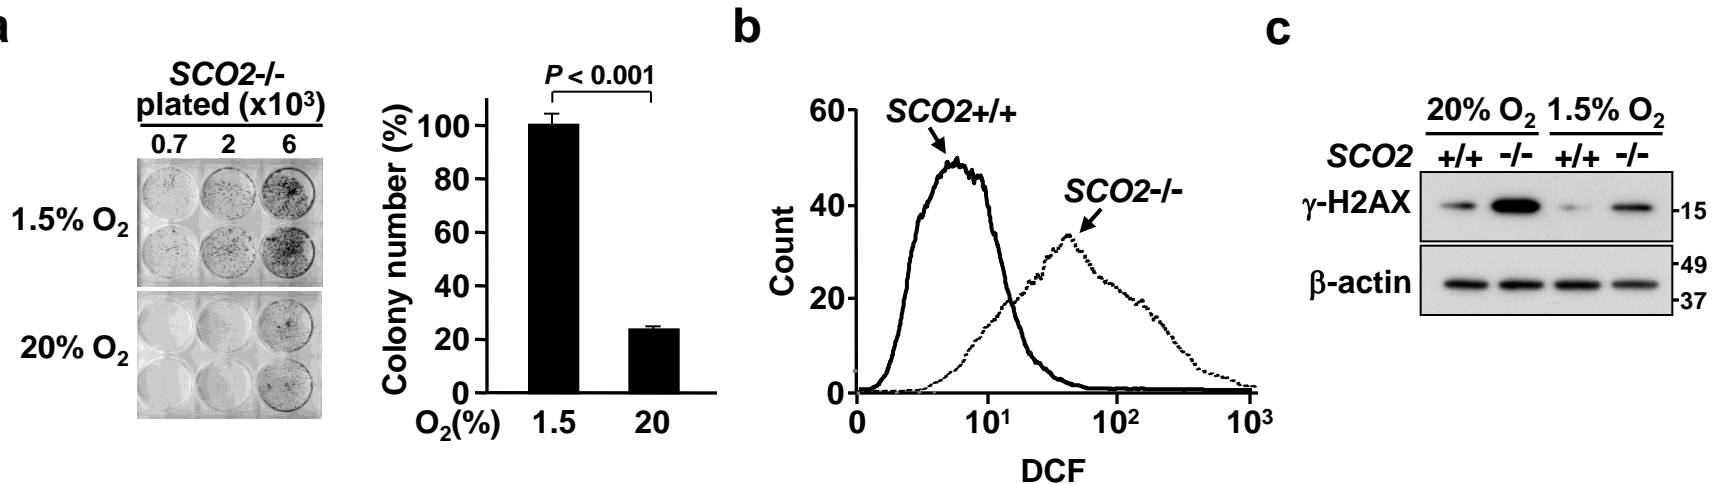

**Supplementary Figure 1. An independently derived *SCO2*<sup>-/-</sup> clone also displays increased ROS production, increased DNA damage response and growth inhibition by oxygen.** An independent *SCO2*<sup>-/-</sup> clone was generated by AAV-mediated homologous recombination and selected under 1.5% oxygen. **a**, Cells were plated at the indicated densities in 6-well plates, cultured under 1.5% or 20% oxygen for 10-12 d, colony formation visualized and quantified by crystal violet staining (n = 4). **b**, ROS levels were detected by DCF staining and quantified by FACS analysis. **c**, Cells were exposed for 48 h at the indicated oxygen concentration and  $\gamma$ -H2AX DNA damage response detected by western blotting. Values shown as mean and s.e.m.; *P*-values determined by Student's *t*-test.

# Supplementary Figure 2

a

## Whole cell ROS

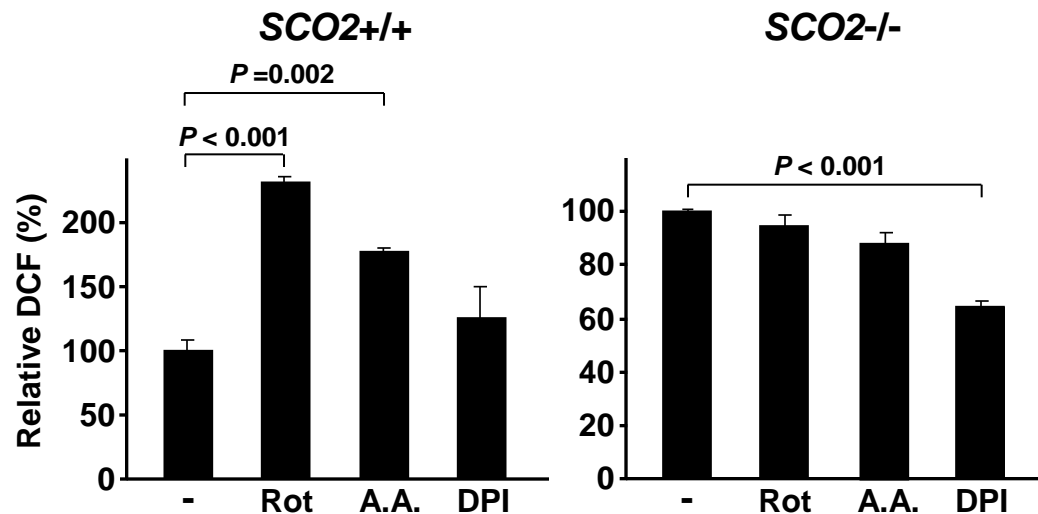

b

## Mitochondrial ROS

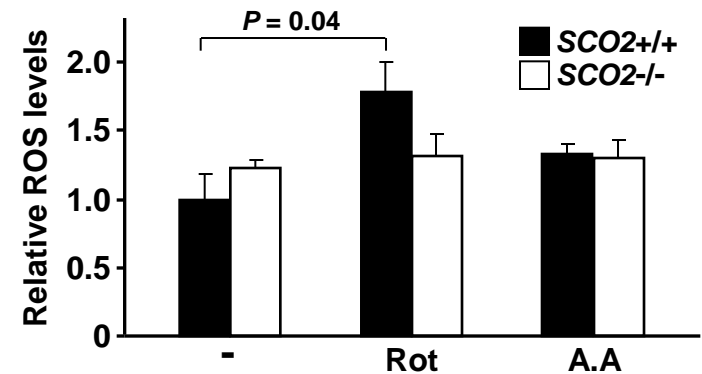

**Supplementary Figure 2. ROS production in *SCO2*<sup>-/-</sup> cells is sensitive to the cytoplasmic NADPH oxidoreductase inhibitor but not to mitochondrial respiratory inhibitors.** **a**, Relative whole cell ROS production measured by DCF FACS analysis after treatment with mitochondrial respiratory inhibitors rotenone (Rot) or antimycin A (A.A.), or cytoplasmic NADPH oxidoreductase inhibitor DPI, ( $n = 3$ ). Cells were attached for 24 h before being treated with 0.1  $\mu\text{M}$  rotenone, 10  $\mu\text{M}$  antimycin A or 1  $\mu\text{M}$  DPI for 24 h. To measure mitochondrial ROS production, mitochondria were purified from cells by standard differential centrifugation and 10  $\mu\text{g}$  of mitochondrial protein was used for ROS detection by the Amplex Red kit (Invitrogen) per manufacturer's instruction<sup>1</sup>. Fluorescence signals were collected using the VICTOR 3TM fluorescence reader (PerkinElmer). **b**, ROS production in response to rotenone or antimycin A was determined in purified mitochondria using Amplex Red ( $n = 3$ ). Values shown as mean and s.e.m.;  $P$ -values determined by Student's  $t$ -test.

# Supplementary Figure 3

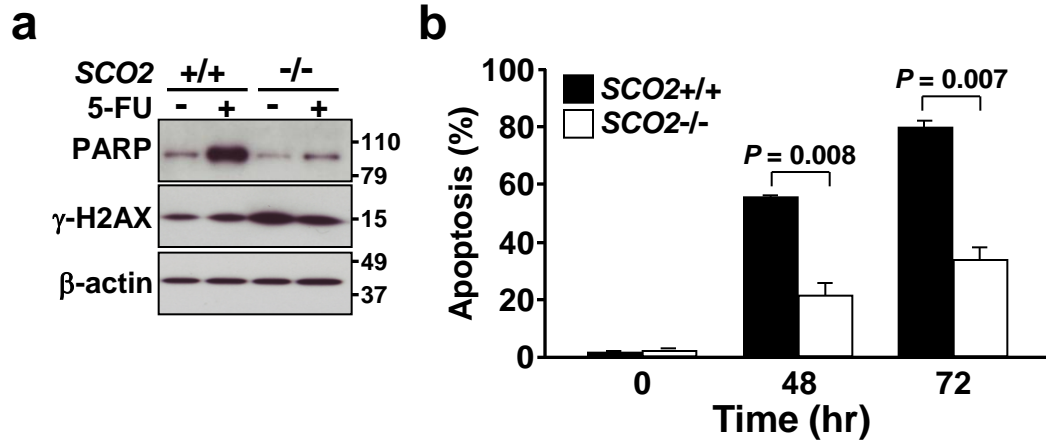

**Supplementary Figure 3. DNA damage response and apoptosis are dissociated.** **a**, Western blot of cleaved PARP and  $\gamma$ -H2AX proteins after 24 h of 5-FU treatment under 20% oxygen condition. *SCO2*<sup>+/+</sup> cells undergo apoptosis as expected but do not show increased DNA damage response. *SCO2*<sup>-/-</sup> cells show high basal DNA damage response but do not significantly increase their level of apoptosis or DNA damage response after 5-FU treatment. **b**, Confirmation of the apoptotic response by Hoechst staining using an Axioskop2 Plus fluorescence microscope with Axiovision software (version 4.6)<sup>2</sup> after 5-FU treatment at the indicated times in *SCO2*<sup>+/+</sup> and *SCO2*<sup>-/-</sup> cells (n = 4). Values shown as mean and s.e.m.; *P*-values determined by Student's t-test.

## Supplementary Figure 4

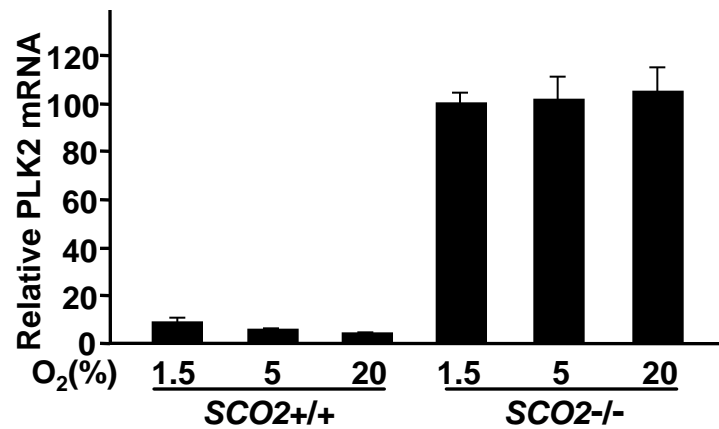

**Supplementary Figure 4. PLK2 expression in *SCO2*<sup>-/-</sup> cells is not affected by oxygen.** After exposing cells to the indicated oxygen concentrations for 48 h, PLK2 mRNA expression levels were quantified and normalized using an ABI HT7900 real-time PCR thermal cycler (Applied Biosystems) as previously described<sup>3</sup>. Values shown as mean and s.e.m. relative to 1.5% oxygen exposed *SCO2*<sup>-/-</sup> cells (n=3).

## REFERENCES

1. Frezza, C., Cipolat, S. & Scorrano, L. Organelle isolation: functional mitochondria from mouse liver, muscle and cultured fibroblasts. *Nat Protoc* **2**, 287-295 (2007).
2. Waldman, T., Lengauer, C., Kinzler, K. W. & Vogelstein, B. Uncoupling of S phase and mitosis induced by anticancer agents in cells lacking p21. *Nature* **381**, 713-716 (1996).
3. Matsumoto, T. et al. Polo-like kinases mediate cell survival in mitochondrial dysfunction. *Proc Natl Acad Sci U S A* **106**, 14542-14546 (2009).
